# Supplementary material
Source: publisher figshare collection journal article supplement (https://acs.figshare.com/ndownloader/files/7396129)
Supplement: Supplementary file 1 [file 7396129]

Supporting information for:

Compactness of the Lithium Peroxide Thin Film  
Formed in Li-O<sub>2</sub> Batteries and Its Link to Charge  
Transport Mechanism: Insights from Stochastic  
Simulations

*Yinghui Yin<sup>a.,b,‡</sup>, Ruijie Zhao<sup>a,b,‡</sup>, Yue Deng<sup>a,b,c</sup> and Alejandro A. Franco<sup>a,b,c,d\*</sup>*

<sup>a</sup> Laboratoire de Réactivité et Chimie des Solides (LRCS), Université de Picardie Jules Verne  
and CNRS, UMR 7314 – 33 rue St. Leu, 80039 Amiens, France

<sup>b</sup> Réseau sur le Stockage Electrochimique de l'Energie (RS2E), CNRS FR3459, 80039 Amiens,  
France

<sup>c</sup> ALISTORE European Research Institute, CNRS FR3104, 80039 Amiens, France

<sup>d</sup> Institut Universitaire de France, 103 Boulevard Saint-Michel, 75005 Paris, France

## Deduction of Jumping Frequency

All the mobile species can move to the neighbor grid units which are occupied by solvent molecules. The rate of the translation is described by the jump frequency ( $v_j$ ), which can be obtained from the Einstein equation of random walk

$$v_j = \frac{2D}{z^2} \quad [S1]$$

where  $z$  is the size of the grid unit and  $D$  is the diffusion coefficient given by the Stokes-Einstein equation

$$D = \frac{kT}{6\pi\mu r} \quad [S2]$$

where  $k$  is the Boltzmann constant,  $T$  is temperature,  $\mu$  is the viscosity of the electrolyte and  $r$  is the hydrodynamic radius of the concerned species. Combining equations S1 and S2, we have

$$v_j = \frac{kT}{3\pi\mu r z^2} \quad [S3]$$

## Collective Motion of Li<sup>+</sup>

To improve the simulation efficiency, in the present work, the motion of Li<sup>+</sup> in the electrolyte is described in a collective way. Instead of the displacement of individual Li<sup>+</sup>, the collective motion of Li<sup>+</sup> is achieved by shuffling the Li<sup>+</sup> distribution after a certain duration of simulation time, during which the Li<sup>+</sup> is considered to be immobile. The demonstration of collective motion approach here refers to cylindrical pores and the wall of the pore is carbon. Same approach is applied to the CNF system as presented in the paper.

There are two important criteria to apply the  $\text{Li}^+$  collective motions procedure. Firstly, the  $\text{Li}^+$  displacement should be overwhelming comparing to any other events in the model. Secondly, the spatial distribution of  $\text{Li}^+$  should be homogeneous. To apply the collective motion procedure, the overlapping rate of  $\text{Li}^+$  in the system between two random fillings is defined (**Table S1**). At the same time, simulations considering the displacement of individual  $\text{Li}^+$  are conducted to track the evolution of the  $\text{Li}^+$  overlapping ratio comparing to its initial configuration. A typical example for a cylindrical pore with a diameter of 20 nm and length of 40 nm is shown in **Figure S1**. Then, the shuffling time step for a certain system is obtained by finding the time corresponding to the overlapping rate of  $\text{Li}^+$  between two random fillings.

**Table S2** The overlapping rates of  $\text{Li}^+$  positions between two random fillings in cylinders with different diameters but the same length of 40 nm; the overlapping rates are mean values after 500

| Diameter / nm      | 10    | 20    | 30    | 40    | 50    | 60    |
|--------------------|-------|-------|-------|-------|-------|-------|
| Overlapping ratio  | 7.73% | 7.17% | 7.81% | 8.51% | 8.30% | 8.47% |
| Standard deviation | 0.60% | 0.30% | 0.21% | 0.15% | 0.14% | 0.13% |

iterations.

**Figure S1** The evolution of the  $\text{Li}^+$  overlapping rate; cylinder diameter is 20 nm, length is 40 nm,

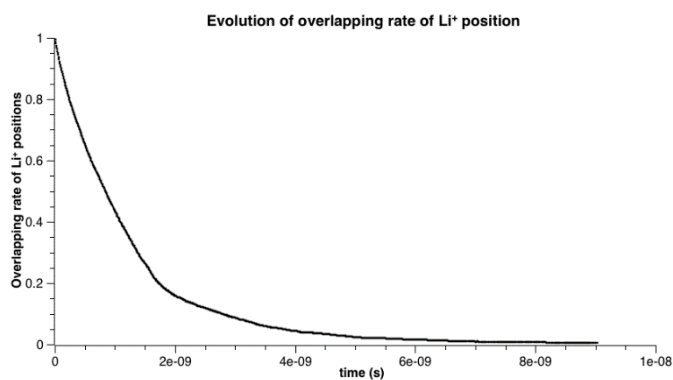

Li<sup>+</sup> concentration is 1 M, Li<sup>+</sup> jump frequency is  $1 \times 10^{10} \text{ s}^{-1}$

**Table S3** The time steps of Li<sup>+</sup> collective motion in cylinders with several diameters and same

| Diameter (nm)           | 10    | 20    | 30    | 40    | 50    | 60    |
|-------------------------|-------|-------|-------|-------|-------|-------|
| Time step (ns)          | 6.049 | 6.427 | 6.549 | 6.611 | 6.434 | 6.587 |
| Standard deviation (ns) | 0.268 | 0.131 | 0.091 | 0.053 | 0.052 | 0.045 |

length of 40 nm; Li<sup>+</sup> concentration is 1 M, Li<sup>+</sup> jump frequency is  $1 \times 10^{10} \text{ s}^{-1}$ .

### Flow-Chart of the Model

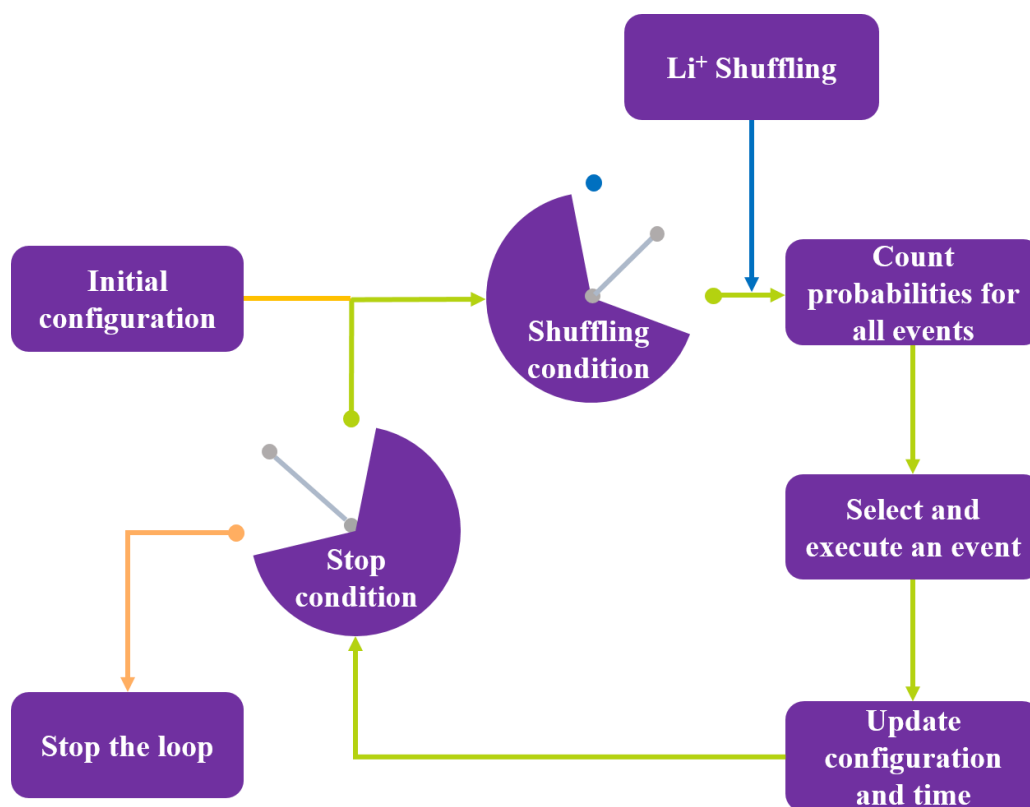

### Li<sub>2</sub>O<sub>2</sub> Formation on CNF with High Diffusion Rate of LiO<sub>2(ip)</sub>

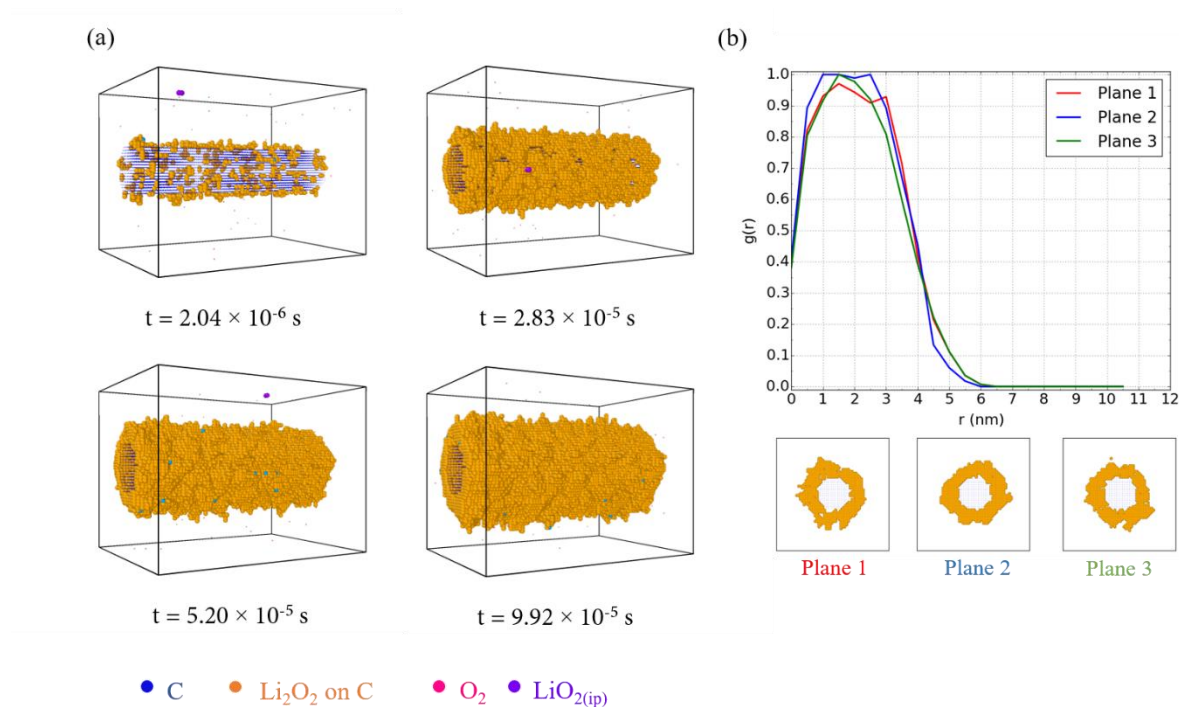

**Figure S3** The evolution of the Li<sub>2</sub>O<sub>2</sub> thin film formation and RDF analysis at fully-discharged state on cat-CNF with high diffusion rate of LiO<sub>2(ip)</sub>. The diameter and the length of the fiber are 8 nm and 40 nm, the dimensions of the cell are 30×30×40 nm in height, depth and length and the diffusion coefficient of LiO<sub>2(ip)</sub> is  $1 \times 10^{-10} \text{ m}^2 \text{ s}^{-1}$ . The Planes 1, 2 and 3 correspond to the intersection of the nanofiber at 5, 20 and 35 nm, respectively. The compactness of the Li<sub>2</sub>O<sub>2</sub> is high regardless the higher of LiO<sub>2(ip)</sub> diffusion rate.
